# Supplementary material for: Untangling Covid-19 Pathophysiology Part I: Oligomeric (Soluble) Fibrin Forming Transient Microclots Enhances the Lethality of Covid-19
Source: Research Square preprint supplement (doi:10.21203/rs.3.rs-142174/v1), 2021-01-09
Supplement: Supplementary file 1 [file 5522cde8c558e7a4434dfa74.docx]

Table 1 Laboratory test results and anticoagulation regimen on three Covid-19 ICU patients
